# Supplementary material for: Tetra-, tetradeca- and octadecametallic clusters of Mn
Source: Royal Society of Chemistry journal article supplement (doi:10.1039/d3dt00732d), 2023-01-01
Supplement: d3dt00732d1.pdf [file d3dt00732d1.pdf]

## ELECTRONIC SUPPLEMENTARY INFORMATION

### **Tetra-, tetradeca- and octadecametallic clusters of Mn**

Eleftheria Agapaki,<sup>a</sup> Angelos B. Canaj,<sup>a</sup> Gary S. Nichol<sup>a</sup> and Euan K. Brechin<sup>\*a</sup>

<sup>a</sup>EaStCHEM School of Chemistry, The University of Edinburgh, David Brewster Road, Edinburgh, EH9 3FJ, Scotland, UK. Email: [ebrechin@ed.ac.uk](mailto:ebrechin@ed.ac.uk)

## 1. Characterization

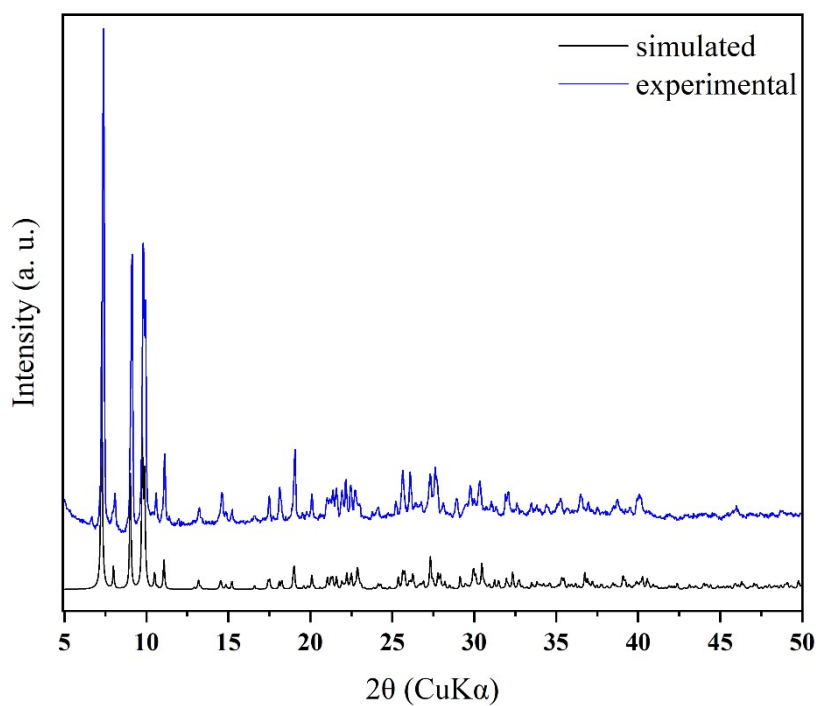

**Fig. S1.** Powder X-ray data for **1**. The blue and black lines are the experimental and simulated data, respectively.

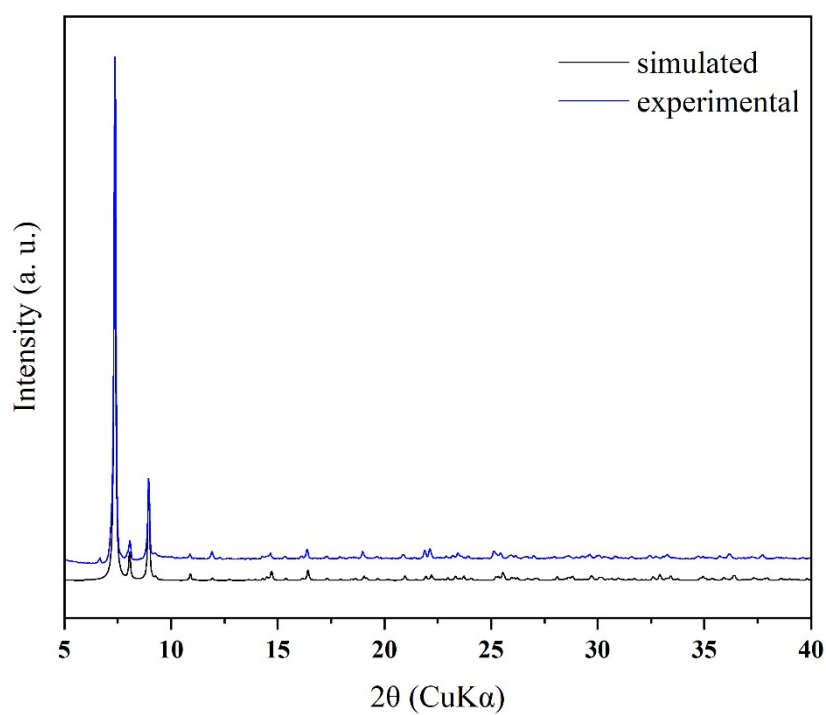

**Fig. S2.** Powder X-ray data for **2**. The blue and black lines are the experimental and simulated data, respectively.

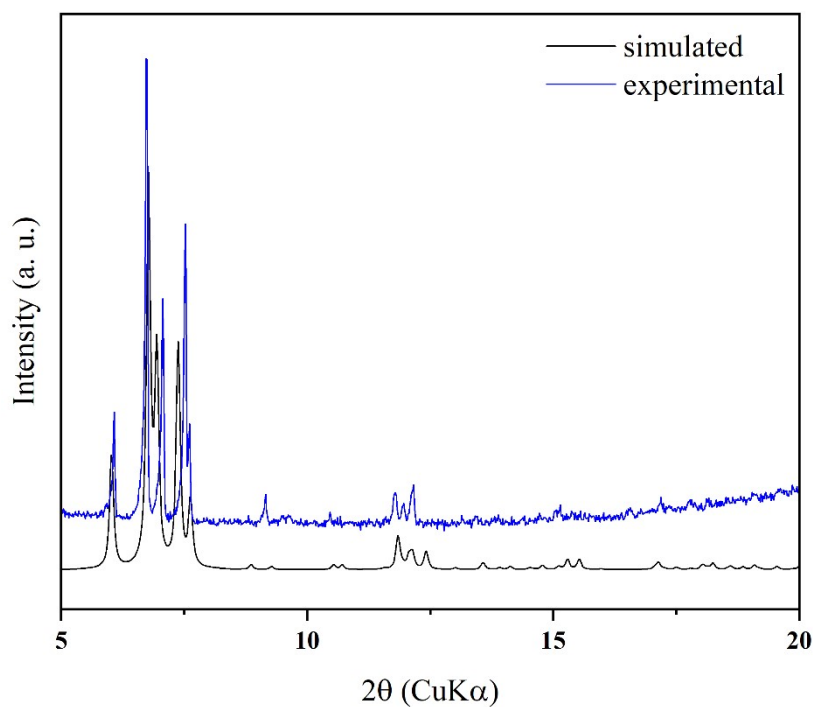

**Fig. S3.** Powder X-ray data for **3**. The blue and black lines are the experimental and simulated data, respectively.

**Table S1.** Bond valence sum calculation for the metal ions in compound **1-3**.

| <b>Compound 1</b> | <b>Mn<sup>II</sup></b> | <b>Mn<sup>III</sup></b> | <b>Mn<sup>IV</sup></b> |
|-------------------|------------------------|-------------------------|------------------------|
| Mn1               | 1.94                   | 2.00                    | 1.98                   |
| Mn2               | 1.91                   | 1.97                    | 1.95                   |
| Mn3               | 1.96                   | 2.02                    | 2.00                   |
| Mn4               | 1.91                   | 1.98                    | 1.96                   |
| <b>Compound 2</b> | <b>Mn<sup>II</sup></b> | <b>Mn<sup>III</sup></b> | <b>Mn<sup>IV</sup></b> |
| Mn1               | 1.85                   | 1.93                    | 1.89                   |
| Mn2               | 1.89                   | 1.91                    | 1.84                   |
| Mn3               | 1.95                   | 1.98                    | 1.90                   |
| Mn4               | 3.17                   | 3.21                    | 3.08                   |
| <b>Compound 3</b> | <b>Mn<sup>II</sup></b> | <b>Mn<sup>III</sup></b> | <b>Mn<sup>IV</sup></b> |
| Mn1               | 3.17                   | 3.21                    | 3.08                   |
| Mn2               | 3.12                   | 3.16                    | 3.03                   |
| Mn3               | 3.24                   | 3.29                    | 3.15                   |
| Mn4               | 3.06                   | 3.19                    | 3.13                   |
| Mn5               | 1.89                   | 1.96                    | 1.92                   |
| Mn6               | 3.19                   | 3.23                    | 3.10                   |
| Mn7               | 1.82                   | 1.88                    | 1.84                   |
| Mn8               | 3.03                   | 3.07                    | 2.95                   |
| Mn9               | 3.18                   | 3.22                    | 3.09                   |

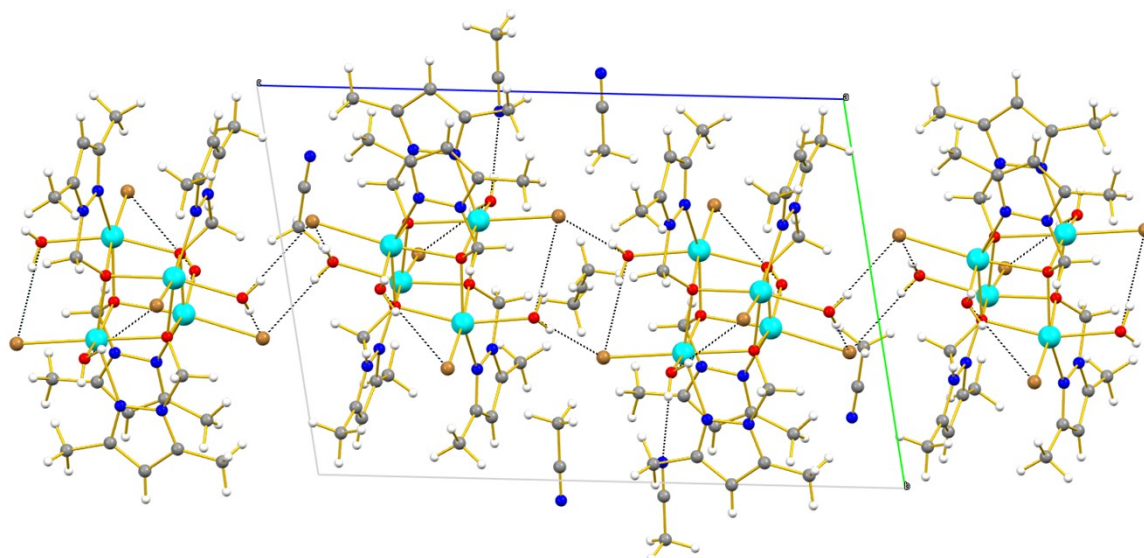

**Fig. S4.** Packing of the clusters of **1** in the extended structure viewed down the  $a$ -axis of the unit cell. H-bonds are highlighted with thin black dotted lines. Colour code: Mn<sup>II</sup> = light blue, C = grey, O = red, N = dark blue, Br = brown. H = white.

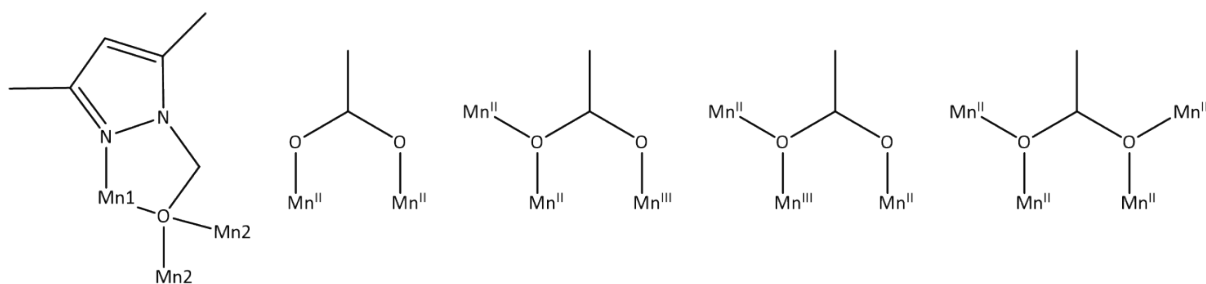

**Fig. S5.** The bridging modes displayed by  $L^1$  and the OAc ligands in **2**.

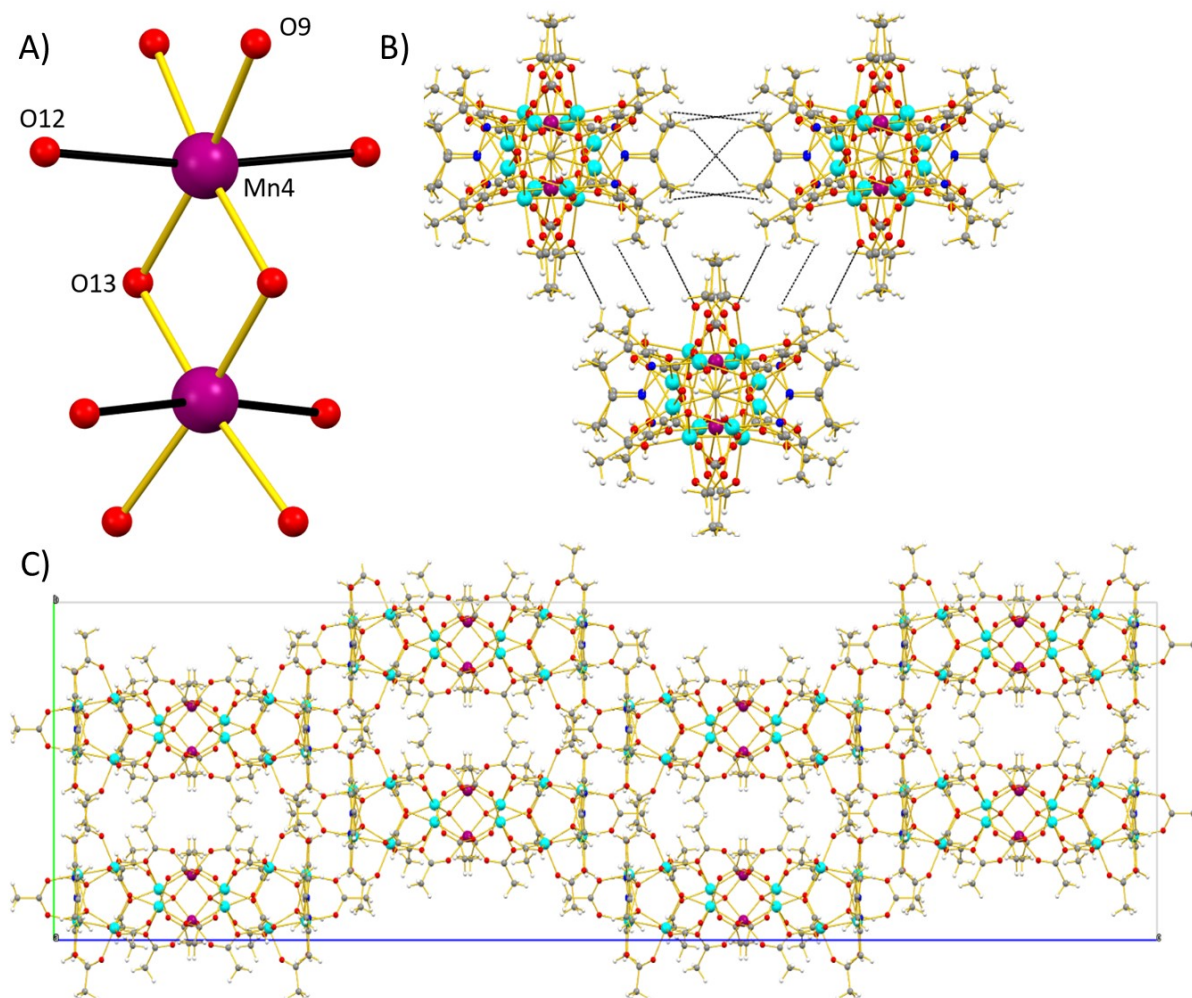

**Fig. S6.** A) The central  $[\text{Mn}^{\text{III}}_2]$  unit in **2**, highlighting the co-parallel Jahn-Teller axes in black. B) View of the close contacts (thin black dotted lines) between clusters of **2**, viewed down the  $c$ -axis. C) Packing of the clusters of **2** in a brickwork-like motif in the extended structure, viewed down the  $a$ -axis (top).

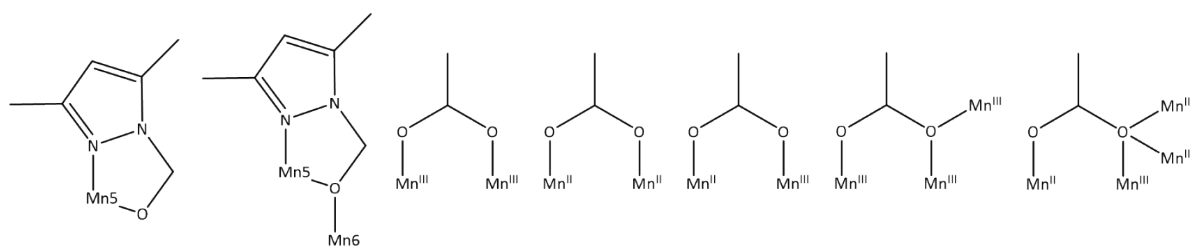

**Fig. S7.** Bridging modes displayed by the  $\text{HL}^1$ ,  $\text{L}^1$  and  $\text{OAc}$  ligands in **3**.

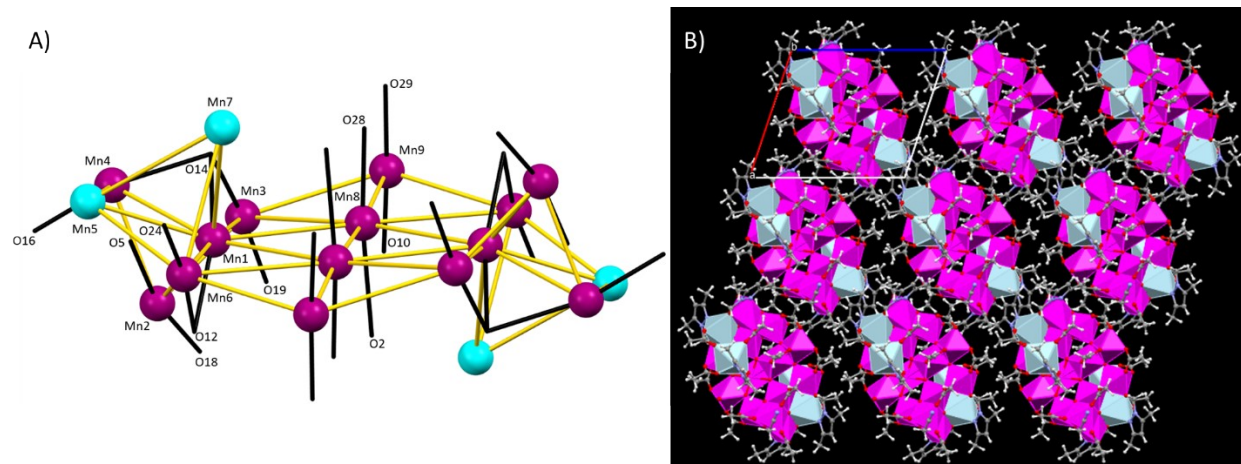

**Fig. S8.** A) The metal core of **3** highlighting the positions of the Jahn-Teller axes in black. B) Packing of **3** in the extended structure viewed down the *b*-axis.

## 3. Magnetic Properties

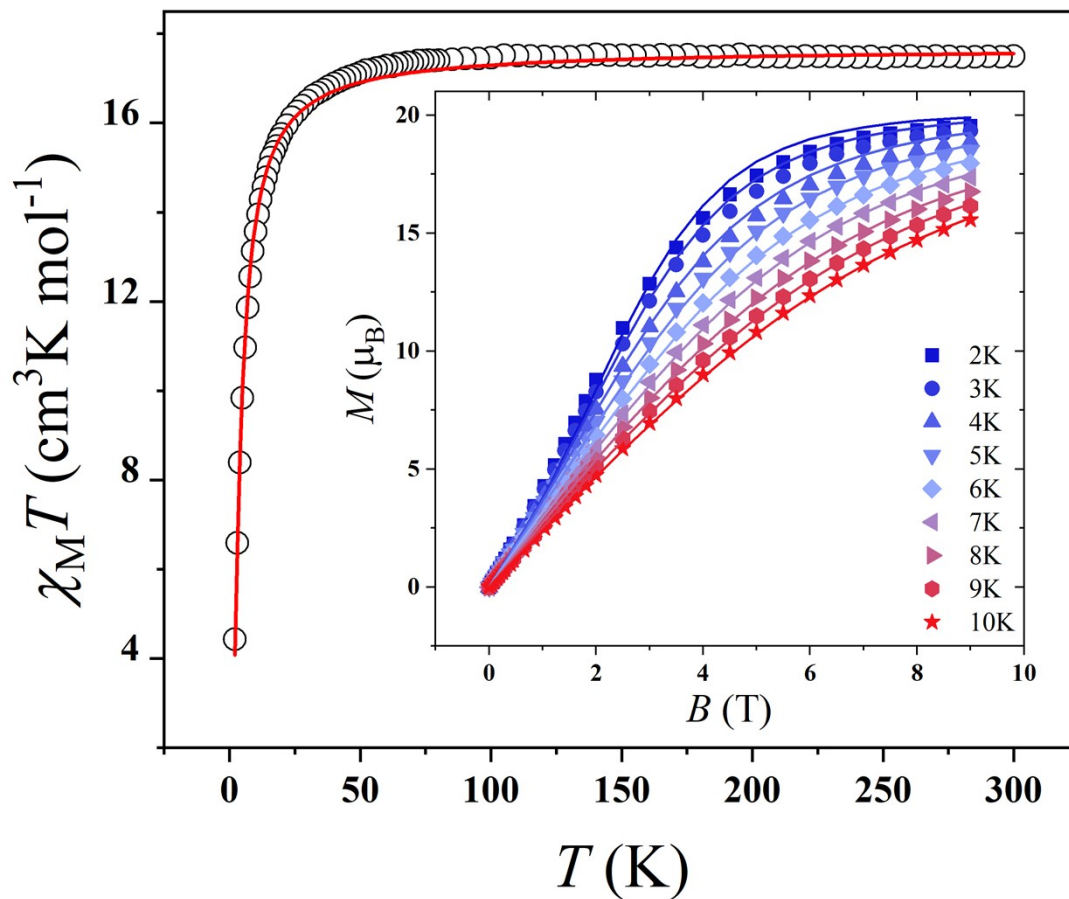

**Fig. S9.** Best fit of the experimental  $\chi T$  product vs.  $T$  and  $M$  vs,  $B$  data for **1** using an anisotropic spin-Hamiltonian. The solid lines represent the best fit of the experimental data affording  $J_1 = -0.18 \text{ cm}^{-1}$ ,  $J_2 = +0.053 \text{ cm}^{-1}$  and  $|D| = 0.05 \text{ cm}^{-1}$ , with  $g = 2.01$  and  $zJ = +7.22 \times 10^{-3} \text{ cm}^{-1}$ .



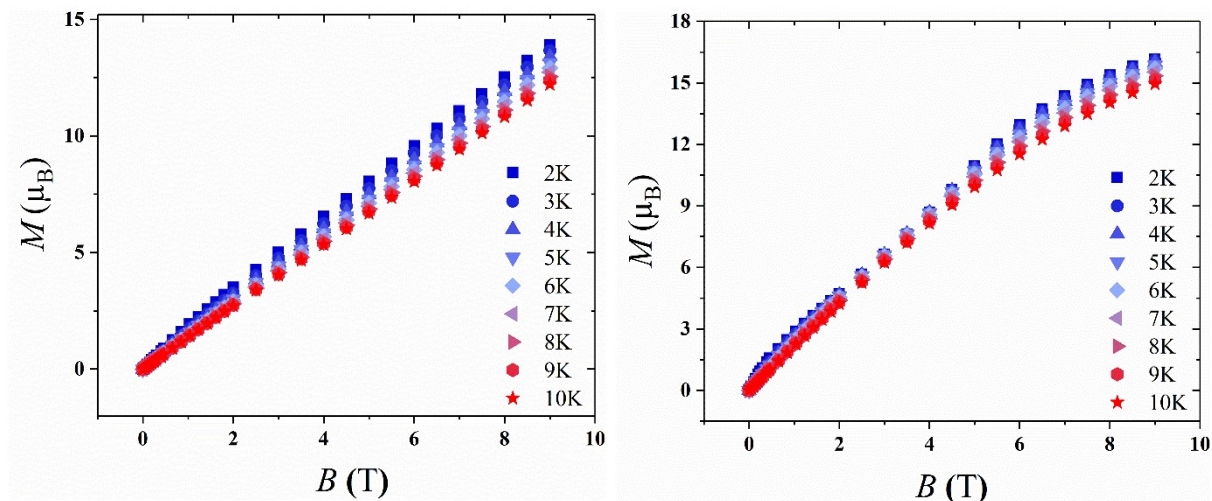

**Fig. S10.** Magnetisation ( $M$ ) versus field ( $B$ ) data for **2** (left) and **3** (right) measured in the  $T = 2$ -300 K and  $B = 0.5$ -9.0 T ranges, respectively.

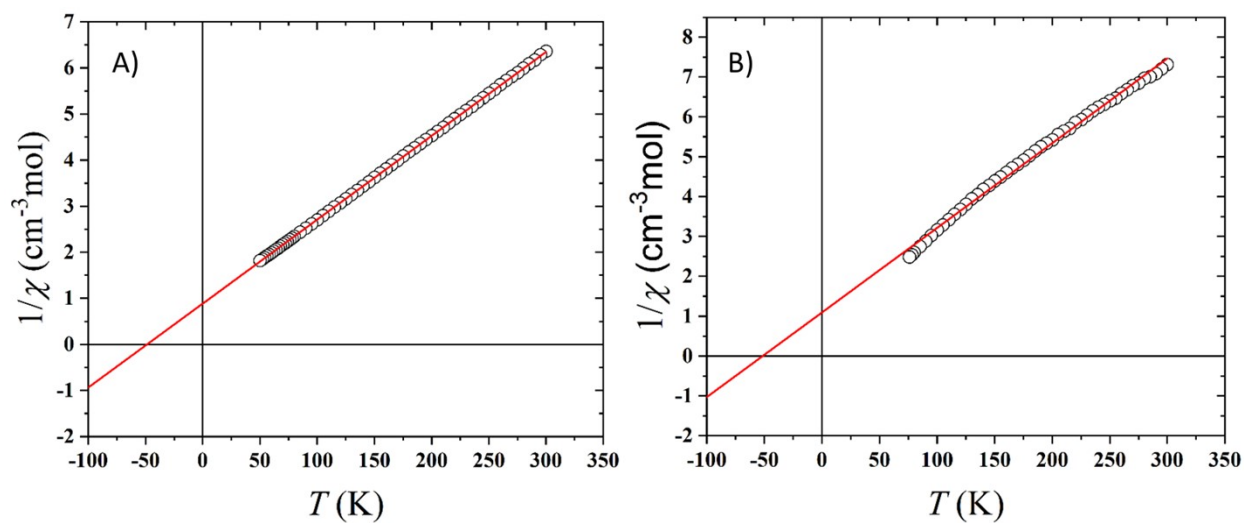

**Fig. S11.** Plot of  $1/\chi$  versus  $T$  for compounds **2** (A) and **3** (B). The solid red line is a fit of the Curie-Weiss law. See main text for details.



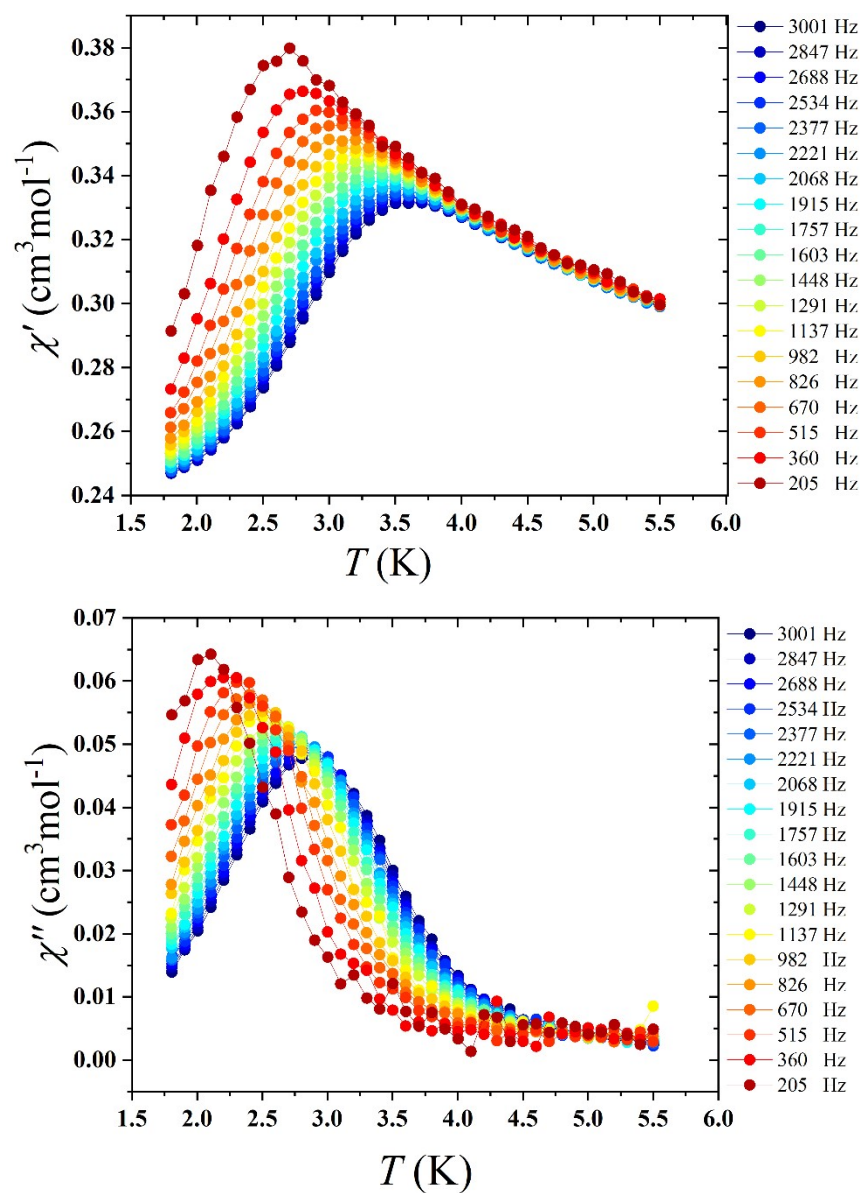

**Fig. S12** Temperature dependence of the in-phase,  $\chi'$  (upper), and out-of-phase,  $\chi''$  (lower), ac susceptibility data in zero dc field for compound **3** with ac frequencies in the range 205–3001 Hz.

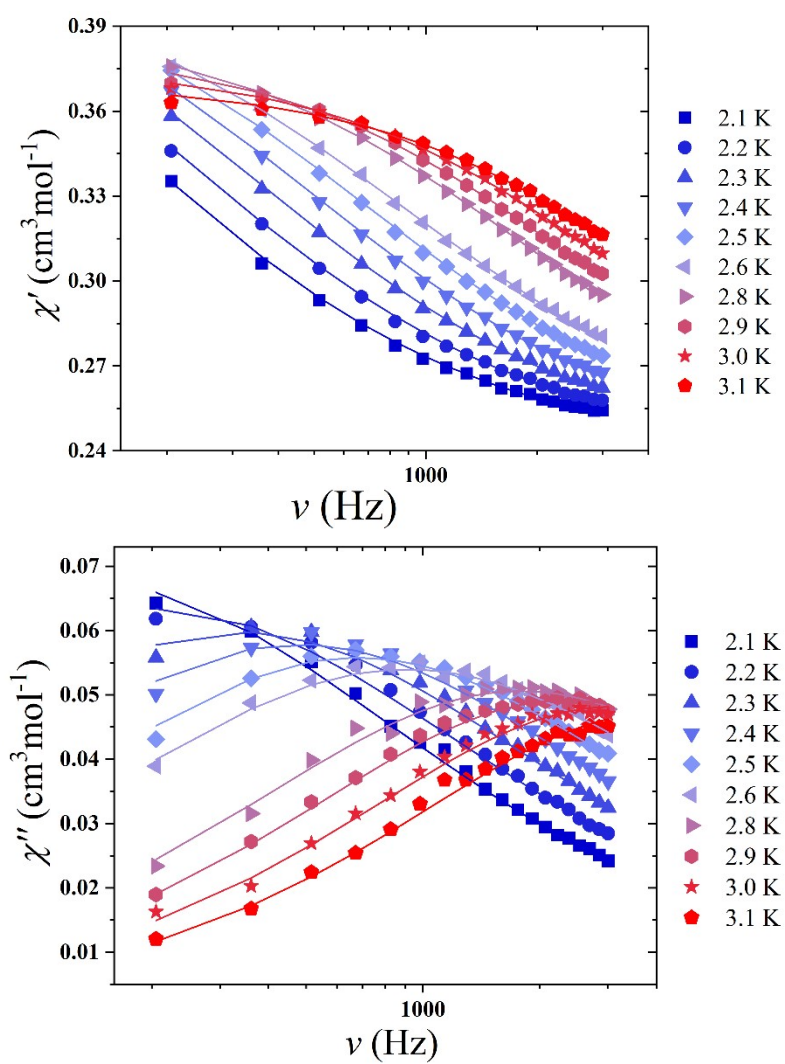

**Fig. S13** Frequency dependence of the in-phase,  $\chi'$  (upper), and out-of-phase,  $\chi''$  (lower), ac susceptibility for compound **3** in zero dc field. The solid lines correspond to the best fit to the generalised Debye law.

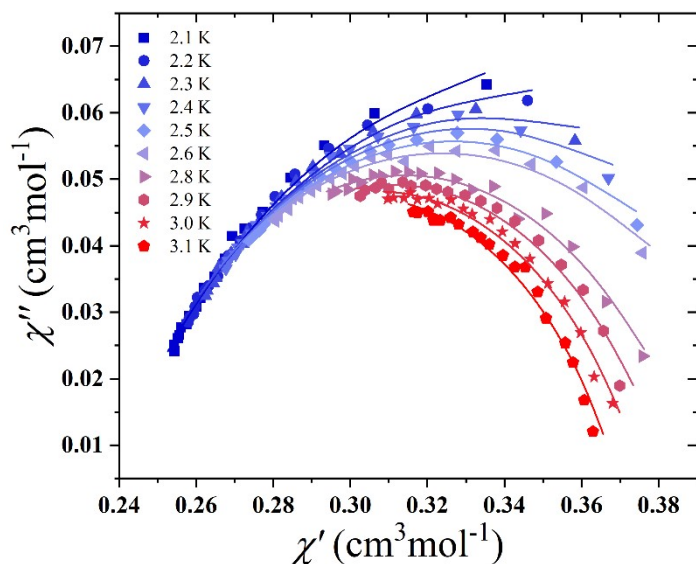

**Fig. S14**  $\chi''$  vs  $\chi'$  plot of the ac magnetic susceptibility data of **3** in zero dc field. The solid lines correspond to the best fit of the Debye law.

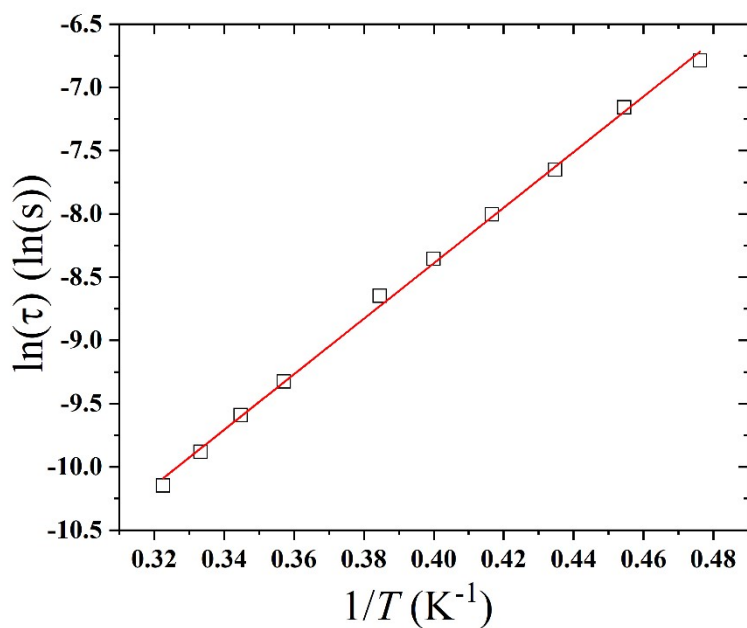

**Fig. S15** Plot of the relaxation time  $\tau$  (logarithmic scale) versus  $T^{-1}$  for compound **3**. The solid red line represents the best fit to the Arrhenius law, with  $U_{\text{eff}} = 22 \text{ K}$  and  $\tau_0 = 3.5 \times 10^{-8} \text{ s}$ .
